# Supplementary material
Source: PubMed Central journal article supplement (PMC4379119)
Supplement: NIHMS625205-supplement-supplement_1.pdf [file NIHMS625205-supplement-supplement_1.pdf]

464 SUPPLEMENT TO BE PUBLISHED ON-LINE:

465 Table 5. Frequency of gestational weight gain (GWG) pattern by characteristics of the sample

466 (n=609).

|                                | N (%) | Early non-<br>excessive; Late<br>non-excessive | Early non-<br>excessive; Late<br>excessive | Early<br>excessive; Late<br>non-excessive | Early<br>excessive; Late<br>excessive |
|--------------------------------|-------|------------------------------------------------|--------------------------------------------|-------------------------------------------|---------------------------------------|
| Prepregnancy body mass index   |       |                                                |                                            |                                           |                                       |
| (kg/m <sup>2</sup> ), n (%) †  |       |                                                |                                            |                                           |                                       |
| Underweight (<18.5)            |       | 25 (33)                                        | 13 (17)                                    | 28 (37)                                   | 9 (12)                                |
| Normal weight (18.5-24.9)      |       | 104 (29)                                       | 109 (30)                                   | 96 (26)                                   | 56 (15)                               |
| Overweight (25.9-29.9)         |       | 13 (12)                                        | 26 (24)                                    | 33 (30)                                   | 37 (34)                               |
| Obese (≥30.0)                  |       | 6 (10)                                         | 18 (30)                                    | 13 (22)                                   | 23 (38)                               |
| Maternal race/ethnicity, n (%) |       |                                                |                                            |                                           |                                       |
| White                          |       | 78 (27)                                        | 81 (28)                                    | 77 (26)                                   | 58 (20)                               |
| Black                          |       | 70 (22)                                        | 85 (27)                                    | 93 (30)                                   | 67 (21)                               |
| Maternal education (years), n  |       |                                                |                                            |                                           |                                       |
| (%) †                          |       |                                                |                                            |                                           |                                       |
| <12                            |       | 42 (25)                                        | 59 (36)                                    | 41 (25)                                   | 23 (14)                               |
| =12                            |       | 92 (25)                                        | 85 (23)                                    | 106 (29)                                  | 81 (22)                               |
| ≥12                            |       | 14 (18)                                        | 22 (28)                                    | 23 (29)                                   | 21 (26)                               |
| Income level (\$/month), n (%) |       |                                                |                                            |                                           |                                       |

|                                    |          |          |          |          |
|------------------------------------|----------|----------|----------|----------|
| <400                               | 87 (24)  | 103 (28) | 105 (29) | 67 (19)  |
| ≥400                               | 58 (26)  | 56 (25)  | 57 (25)  | 54 (24)  |
| Prenatal smoking, n (%)            |          |          |          |          |
| None                               | 58 (21)  | 82 (29)  | 76 (27)  | 67 (24)  |
| <0.5 packs/day                     | 35 (27)  | 31 (24)  | 34 (26)  | 31 (24)  |
| 0.5 to <1 packs/day                | 34 (31)  | 31 (28)  | 32 (29)  | 12 (11)  |
| ≥1 packs/day                       | 21 (24)  | 22 (26)  | 28 (33)  | 15 (17)  |
| Prenatal alcohol use, n (%)        |          |          |          |          |
| None                               | 47 (22)  | 56 (26)  | 57 (27)  | 52 (25)  |
| >0 to <1.5 drinks/week             | 35 (28)  | 41 (33)  | 28 (22)  | 22 (18)  |
| 1.5 drink/week to <1<br>drinks/day | 34 (22)  | 45 (29)  | 43 (28)  | 32 (21)  |
| ≥1 drinks/day                      | 32 (27)  | 24 (21)  | 42 (36)  | 19 (16)  |
| Prenatal marijuana use, n (%)      |          |          |          |          |
| None                               | 92 (26)  | 90 (25)  | 94 (27)  | 79 (22)  |
| >0 to <0.5 joint/day               | 29 (23)  | 46 (36)  | 33 (26)  | 21 (16)  |
| 0.5 to <1 joints/day               | 10 (23)  | 9 (20)   | 14 (32)  | 11 (25)  |
| ≥1 joints/day                      | 17 (21)  | 21 (26)  | 29 (36)  | 14 (17)  |
| Gestational age at delivery, n (%) |          |          |          |          |
| <37 weeks                          | 17 (30)  | 16 (29)  | 18 (32)  | 5 (9)    |
| ≥37 weeks                          | 131 (24) | 150 (27) | 152 (28) | 120 (22) |

---

 Birth weight for gestational age

## z-score, n (%) \*

|                                                                          |          |          |          |          |
|--------------------------------------------------------------------------|----------|----------|----------|----------|
| Small for age (<10 <sup>th</sup> percentile)                             | 33 (33)  | 23 (23)  | 27 (27)  | 16 (16)  |
| Appropriate for age (10 <sup>th</sup> to<br>90 <sup>th</sup> percentile) | 112 (23) | 136 (28) | 138 (28) | 102 (21) |
| Large for age (>90 <sup>th</sup> percentile)                             | 3 (14)   | 7 (32)   | 5 (23)   | 7 (32)   |

## Infant sex, n (%)

|        |         |         |         |         |
|--------|---------|---------|---------|---------|
| Female | 77 (25) | 82 (27) | 82 (27) | 62 (21) |
| Male   | 71 (23) | 84 (28) | 88 (29) | 63 (21) |

## Ever breastfed infant, n (%)

|     |          |          |          |         |
|-----|----------|----------|----------|---------|
| Yes | 26 (21)  | 30 (24)  | 39 (31)  | 30 (24) |
| No  | 108 (25) | 123 (28) | 118 (27) | 87 (20) |

---

 467 † Pearson chi-square test  $p < 0.05$ 

468 \* Reference for birth weight for gestational age z-score (20)
